# Supplementary material
Source: PubMed Central journal article supplement (PMC2409011)
Supplement: pp.108.115923_1.pdf [file pp.108.115923_1.pdf]

**TABLE 1. Percentage abnormal seeds (white seeds) in wild type and mutants.**  
 Siliques produced by plants with indicated genotypes were opened, and the color of the seeds were observed and counted.

|                         | Wild type<br>(COL-er) | <i>luh-1</i> | <i>luh-1/luh-1</i> ;<br><i>lug-16/+</i> | <i>lug-16</i> |
|-------------------------|-----------------------|--------------|-----------------------------------------|---------------|
| White                   | 11                    | 16           | 56                                      | 18            |
| Green                   | 368                   | 374          | 97                                      | 382           |
| % White                 | 2.9%                  | 4.1%         | 36.6%                                   | 4.5%          |
| N (Number of<br>Plants) | 10                    | 10           | 6                                       | 10            |
